# Supplementary material
Source: PubMed Central journal article supplement (PMC7448627)
Supplement: JCM.00730-20-s0001.pdf [file JCM.00730-20-s0001.pdf]

Table S1. Metadata and ID of the 100 Elizabethkingia NCBI and SRA reference genomes used in this study.

| Reference accession | Elizabethkingia species | Strain          | Year | Country             | Host                            | Disease               | Publication                                                                                                                                                                                               |
|---------------------|-------------------------|-----------------|------|---------------------|---------------------------------|-----------------------|-----------------------------------------------------------------------------------------------------------------------------------------------------------------------------------------------------------|
| GCA_000447375.1     | <i>anophelis</i>        | 502             | 2012 | UK:<br>Birmingham   | <i>H. sapiens</i> wound swab    |                       | Quick J et al., "Draft Genome Sequence of Elizabethkingia meningoseptica Isolated from a Traumatic Wound.", <i>Genome Announc</i> , 2014 May 8;2(3)                                                       |
| GCA_002022065.1     | <i>anophelis</i>        | 3375            | 1957 | USA: South Carolina | <i>H. sapiens</i>               |                       | Nicholson AC et al., "Draft Genome Sequences of Strains Representing Each of the Elizabethkingia Genomospecies Previously Determined by DNA-DNA Hybridization.", <i>Genome Announc</i> , 2016 Mar 10;4(2) |
| GCA_003293835.1     | <i>anophelis</i>        | 6499925         | 2017 | USA                 | <i>H. sapiens</i> blood         |                       | walter reed army institute of research                                                                                                                                                                    |
| GCA_003293825.1     | <i>anophelis</i>        | 40313151        | 2016 | USA                 | <i>H. sapiens</i> blood         |                       | walter reed army institute of research                                                                                                                                                                    |
| GCA_002023235.2     | <i>anophelis</i>        | E6809           | 1979 | USA: California     | <i>H. sapiens</i> blood         |                       | Nicholson AC et al., "Draft Genome Sequences of Strains Representing Each of the Elizabethkingia Genomospecies Previously Determined by DNA-DNA Hybridization.", <i>Genome Announc</i> , 2016 Mar 10;4(2) |
| GCA_001482795.1     | <i>anophelis</i>        | 12012-2 PRCM    | 2009 | China: Quanzhou     | <i>H. sapiens</i> sputum 82yo M | Respiratory infection |                                                                                                                                                                                                           |
| SAMEA4026799        | <i>anophelis</i>        | AmMS250         | 1994 | USA                 | <i>H. sapiens</i>               |                       | INSTITUT PASTEUR                                                                                                                                                                                          |
| GCA_000240095.3     | <i>anophelis</i>        | Ag1             | 2010 | USA: New Mexico     | <i>A. gambiae</i> gut           |                       | Kukutla P et al., "Draft Genome Sequences of Elizabethkingia anophelis Strains R26T and Ag1 from the Midgut of the Malaria Mosquito Anopheles gambiae.", <i>Genome Announc</i> , 2013 Dec 5;1(6)          |
| GCA_001051975.1     | <i>anophelis</i>        | As1             | 2013 | USA                 | whole mosquito body             |                       | Raygoza Garay JA et al., "Genome Sequence of Elizabethkingia anophelis Strain EaAs1, Isolated from the Asian Malaria Mosquito Anopheles stephensi.", <i>Genome Announc</i> , 2016 Mar 10;4(2)             |
| GCA_000735205.1     | <i>anophelis</i>        | B2D             | 2013 | Malaysia            | Dental Plaque                   |                       |                                                                                                                                                                                                           |
| GCA_900157025.1     | <i>anophelis</i>        | CIP111046       | 2018 |                     |                                 |                       |                                                                                                                                                                                                           |
| GCA_900156995.1     | <i>anophelis</i>        | CIP111067       | 2016 |                     |                                 |                       |                                                                                                                                                                                                           |
| GCA_900156985.1     | <i>anophelis</i>        | CIP60.58        | 2017 |                     |                                 |                       |                                                                                                                                                                                                           |
| SAMEA4026797        | <i>anophelis</i>        | 8707            | 1962 | USA                 |                                 |                       |                                                                                                                                                                                                           |
| GCA_002023325.1     | <i>anophelis</i>        | CSID_3000516074 | 2016 | USA: Illinois       | <i>H. sapiens</i>               |                       | Nicholson AC et al., "Draft Genome Sequences of Strains Representing Each of the Elizabethkingia Genomospecies Previously Determined by DNA-DNA Hybridization.", <i>Genome Announc</i> , 2016 Mar 10;4(2) |
| GCA_002023425.1     | <i>anophelis</i>        | CSID_3000516810 | 2016 | USA: Arizona        | <i>H. sapiens</i>               |                       | Nicholson AC et al., "Draft Genome Sequences of Strains Representing Each of the Elizabethkingia Genomospecies Previously Determined by DNA-DNA Hybridization.", <i>Genome Announc</i> , 2016 Mar 10;4(2) |
| GCA_002023565.1     | <i>anophelis</i>        | CSID_3000516978 | 2016 | USA: California     | <i>H. sapiens</i>               |                       | Nicholson AC et al., "Draft Genome Sequences of Strains Representing Each of the Elizabethkingia Genomospecies Previously Determined by DNA-DNA Hybridization.", <i>Genome Announc</i> , 2016 Mar 10;4(2) |

|                 |                  |                 |      |                    |                          |                         |                                                                                                                                                                                                           |
|-----------------|------------------|-----------------|------|--------------------|--------------------------|-------------------------|-----------------------------------------------------------------------------------------------------------------------------------------------------------------------------------------------------------|
| GCA_002023625.1 | <i>anophelis</i> | CSID_3000517066 | 2016 | USA: Texas         | <i>H. sapiens</i>        |                         | Nicholson AC et al., "Draft Genome Sequences of Strains Representing Each of the Elizabethkingia Genomospecies Previously Determined by DNA-DNA Hybridization.", <i>Genome Announc</i> , 2016 Mar 10;4(2) |
| GCA_001618505.2 | <i>anophelis</i> | CSID_3000521207 | 2016 | USA: Wisconsin     | <i>H. sapiens</i>        |                         | Nicholson AC et al., "Complete Genome Sequences of Four Strains from the 2015-2016 Elizabethkingia anophelis Outbreak.", <i>Genome Announc</i> , 2016 Jun 16;4(3)                                         |
| GCA_002995695.1 | <i>anophelis</i> | CSID_3000653323 | 2016 | USA: Tennessee     | <i>H. sapiens</i> blood  |                         | Nicholson AC et al., "Draft Genome Sequences of Strains Representing Each of the Elizabethkingia Genomospecies Previously Determined by DNA-DNA Hybridization.", <i>Genome Announc</i> , 2016 Mar 10;4(2) |
| GCA_002995725.1 | <i>anophelis</i> | CSID_3000726811 | 2017 | USA: Minnesota     | <i>H. sapiens</i> Urine  |                         | Nicholson AC et al., "Draft Genome Sequences of Strains Representing Each of the Elizabethkingia Genomospecies Previously Determined by DNA-DNA Hybridization.", <i>Genome Announc</i> , 2016 Mar 10;4(2) |
| GCA_001596175.2 | <i>anophelis</i> | CSID_3015183678 | 2016 | USA: Wisconsin     | <i>H. sapiens</i>        |                         | Nicholson AC et al., "Complete Genome Sequences of Four Strains from the 2015-2016 Elizabethkingia anophelis Outbreak.", <i>Genome Announc</i> , 2016 Jun 16;4(3)                                         |
| GCA_002023645.1 | <i>anophelis</i> | CSID_3015183679 | 2016 | USA: Wisconsin     | <i>H. sapiens</i>        |                         | Nicholson AC et al., "Draft Genome Sequences of Strains Representing Each of the Elizabethkingia Genomospecies Previously Determined by DNA-DNA Hybridization.", <i>Genome Announc</i> , 2016 Mar 10;4(2) |
| GCA_002023695.1 | <i>anophelis</i> | CSID_3015183680 | 2016 | USA: Wisconsin     | <i>H. sapiens</i>        |                         | Nicholson AC et al., "Draft Genome Sequences of Strains Representing Each of the Elizabethkingia Genomospecies Previously Determined by DNA-DNA Hybridization.", <i>Genome Announc</i> , 2016 Mar 10;4(2) |
| GCA_001618545.2 | <i>anophelis</i> | CSID_3015183681 | 2016 | USA: Wisconsin     | <i>H. sapiens</i>        |                         | Nicholson AC et al., "Complete Genome Sequences of Four Strains from the 2015-2016 Elizabethkingia anophelis Outbreak.", <i>Genome Announc</i> , 2016 Jun 16;4(3)                                         |
| GCA_001618465.2 | <i>anophelis</i> | CSID_3015183684 | 2016 | USA: Wisconsin     | <i>H. sapiens</i> blood  |                         | Nicholson AC et al., "Complete Genome Sequences of Four Strains from the 2015-2016 Elizabethkingia anophelis Outbreak.", <i>Genome Announc</i> , 2016 Jun 16;4(3)                                         |
| GCA_002023705.1 | <i>anophelis</i> | CSID_3015183686 | 2016 | USA: Wisconsin     | <i>H. sapiens</i>        |                         | Nicholson AC et al., "Draft Genome Sequences of Strains Representing Each of the Elizabethkingia Genomospecies Previously Determined by DNA-DNA Hybridization.", <i>Genome Announc</i> , 2016 Mar 10;4(2) |
| GCA_001703835.1 | <i>anophelis</i> | EM361-97        | 2010 | Taiwan: Kaohsiung  | <i>H. sapiens</i> blood  | Lung cancer (47yo male) | Lin JN et al., "Draft Genome Sequence of Elizabethkingia anophelis Strain EM361-97 Isolated from the Blood of a Cancer Patient.", <i>Genome Announc</i> , 2016 Oct 27;4(5)                                |
| GCA_002022085.1 | <i>anophelis</i> | F3201           | 1982 | Kuwait             | <i>H. sapiens</i>        |                         | Nicholson AC et al., "Draft Genome Sequences of Strains Representing Each of the Elizabethkingia Genomospecies Previously Determined by DNA-DNA Hybridization.", <i>Genome Announc</i> , 2016 Mar 10;4(2) |
| GCA_002024825.1 | <i>anophelis</i> | F3543           | 1982 | USA: Florida       | <i>H. sapiens</i> CFS    |                         | Nicholson AC et al., "Draft Genome Sequences of Strains Representing Each of the Elizabethkingia Genomospecies Previously Determined by DNA-DNA Hybridization.", <i>Genome Announc</i> , 2016 Mar 10;4(2) |
| GCA_002951455.1 | <i>anophelis</i> | FDAARGOS_134    | 2014 | USA: Washington DC | Imo M tracheal aspirate  | Trachitis               | FDA Grant                                                                                                                                                                                                 |
| GCA_002277995.2 | <i>anophelis</i> | FDAARGOS_198    |      | Sweden             | <i>H. sapiens</i> blood  | Infection?              | FDA Grant                                                                                                                                                                                                 |
| GCA_001011675.1 | <i>anophelis</i> | FMS-007         | 2015 | China              | <i>H. sapiens</i> sputum |                         | Sun G et al., "Complete Genome Sequence of Elizabethkingia meningoseptica, Isolated from a T-Cell                                                                                                         |

|                 |                       |                 |      |                 |                                      |                             |                                                                                                                                                                                                              |
|-----------------|-----------------------|-----------------|------|-----------------|--------------------------------------|-----------------------------|--------------------------------------------------------------------------------------------------------------------------------------------------------------------------------------------------------------|
|                 |                       |                 |      |                 |                                      |                             | Non-Hodgkin's Lymphoma Patient.", Genome Announc, 2015 Jun 25;3(3)                                                                                                                                           |
| GCA_002022045.1 | <i>anophelis</i>      | JM-87           | 2011 | USA: Atlanta    | Zea mays (maise)                     | nil                         | Nicholson AC et al., "Draft Genome Sequences of Strains Representing Each of the Elizabethkingia Genomospecies Previously Determined by DNA-DNA Hybridization.", Genome Announc, 2016 Mar 10;4(2)            |
| GCA_900156945.1 | <i>anophelis</i>      | LDVH-AR107      | 2004 | France          | Cyprinus carpio (Internal organs)    |                             |                                                                                                                                                                                                              |
| GCA_000496055.1 | <i>anophelis</i>      | NUH11           | 2012 | Singapore       | Hospital sink                        | nil                         | Teo J et al., "First case of E anophelis outbreak in an intensive-care unit.", Lancet, 2013 Sep 7;382(9895):855-7                                                                                            |
| GCA_000496015.1 | <i>anophelis</i>      | NUH4            | 2012 | Singapore       | Hospital sink                        | nil                         | Teo J et al., "First case of E anophelis outbreak in an intensive-care unit.", Lancet, 2013 Sep 7;382(9895):855-6                                                                                            |
| GCA_000496035.1 | <i>anophelis</i>      | NUH6            | 2012 | Singapore       | Hospital sink                        | nil                         | Teo J et al., "First case of E anophelis outbreak in an intensive-care unit.", Lancet, 2013 Sep 7;382(9895):855-6                                                                                            |
| GCA_000495935.2 | <i>anophelis</i>      | NUHP1           | 2012 | Singapore       | <i>H. sapiens</i>                    | Cardio-thoracic ICU patient | Li Y et al., "Complete Genome Sequence and TranSouth Carolinariptomic Analysis of the Novel Pathogen Elizabethkingia anophelis in Response to Oxidative Stress.", Genome Biol Evol, 2015 May 26;7(6):1676-85 |
| GCA_002843925.1 | <i>anophelis</i>      | OSUVM1          | 2016 | USA: Oklahoma   | Equine Stall                         | nil                         |                                                                                                                                                                                                              |
| GCA_000689515.1 | <i>anophelis</i>      | Po0527107       | 2014 |                 |                                      |                             |                                                                                                                                                                                                              |
| GCA_000982575.1 | <i>anophelis</i>      | PW2806          | 2015 |                 |                                      |                             |                                                                                                                                                                                                              |
| GCA_002888615.1 | <i>anophelis</i>      | PW2810          | 2015 |                 |                                      |                             |                                                                                                                                                                                                              |
| GCA_002023665.2 | <i>anophelis</i>      | R26             | 2006 | Sweden          | Anopheles gambiae lab colony         |                             | Nicholson AC et al., "Draft Genome Sequences of Strains Representing Each of the Elizabethkingia Genomospecies Previously Determined by DNA-DNA Hybridization.", Genome Announc, 2016 Mar 10;4(2)            |
| SAMD00012202    | <i>meningoseptica</i> | GTC_09686       |      |                 |                                      |                             | Gifu University South Carolinahool of Medicine Pathogenic Bacterial Genetic Resorce Stock Center (GMGC); 2014-04-21                                                                                          |
| SAMD00009502    | <i>meningoseptica</i> | GTC_10754       |      |                 |                                      |                             | Gifu University South Carolinahool of Medicine Pathogenic Bacterial Genetic Resorce Stock Center (GMGC); 2014-04-21                                                                                          |
| SAMEA104652859  | <i>meningoseptica</i> | ERR2719365      |      |                 |                                      |                             | Wellcome Sanger Institute                                                                                                                                                                                    |
| GCA_900156975.1 | <i>meningoseptica</i> | 58-80           | 1980 | Israel          | <i>H. sapiens</i> (tracheal exudate) |                             |                                                                                                                                                                                                              |
| GCA_002002525.1 | <i>meningoseptica</i> | 61421 PRCM      | 2006 | China, Quanzhou | <i>H. sapiens</i>                    | Intracranial infection      |                                                                                                                                                                                                              |
| GCA_000401415.1 | <i>meningoseptica</i> | ATCC 13253      |      |                 |                                      |                             | Matyi SA et al., "Draft Genome Sequences of Elizabethkingia meningoseptica.", Genome Announc, 2013 Jul 11;1(4)                                                                                               |
| GCA_900092105.1 | <i>meningoseptica</i> | CCUG 214        |      |                 |                                      |                             |                                                                                                                                                                                                              |
| GCA_900156965.1 | <i>meningoseptica</i> | CIP111048       |      |                 |                                      |                             |                                                                                                                                                                                                              |
| GCA_002023305.1 | <i>meningoseptica</i> | CSID_3000515919 | 2016 | USA: Minnesota  | <i>H. sapiens</i>                    |                             | Nicholson AC et al., "Draft Genome Sequences of Strains Representing Each of the Elizabethkingia Genomospecies Previously Determined by DNA-DNA Hybridization.", Genome Announc, 2016 Mar 10;4(2)            |
| GCA_002023465.1 | <i>meningoseptica</i> | CSID_3000516359 | 2016 | USA: Wisconsin  | <i>H. sapiens</i>                    |                             | Nicholson AC et al., "Draft Genome Sequences of Strains Representing Each of the Elizabethkingia Genomospecies                                                                                               |

|                 |                       |                 |      |                     |                                           |                                  |                                                                                                                                                                                                   |
|-----------------|-----------------------|-----------------|------|---------------------|-------------------------------------------|----------------------------------|---------------------------------------------------------------------------------------------------------------------------------------------------------------------------------------------------|
| GCA_002023435.1 | <i>meningoseptica</i> | CSID_3000516465 | 2016 | USA: Michigan       | <i>H. sapiens</i>                         |                                  | Previously Determined by DNA-DNA Hybridization.", Genome Announc, 2016 Mar 10;4(2)                                                                                                                |
| GCA_002023505.1 | <i>meningoseptica</i> | CSID_3000516535 | 2016 | USA: Florida        | <i>H. sapiens</i>                         |                                  | Nicholson AC et al., "Draft Genome Sequences of Strains Representing Each of the Elizabethkingia Genomospecies Previously Determined by DNA-DNA Hybridization.", Genome Announc, 2016 Mar 10;4(2) |
| GCA_002023585.1 | <i>meningoseptica</i> | CSID_3000516977 | 2016 | USA: Texas          | <i>H. sapiens</i>                         |                                  | Nicholson AC et al., "Draft Genome Sequences of Strains Representing Each of the Elizabethkingia Genomospecies Previously Determined by DNA-DNA Hybridization.", Genome Announc, 2016 Mar 10;4(2) |
| GCA_001718075.1 | <i>meningoseptica</i> | EM1             | 2016 |                     | <i>H. sapiens</i> (blood)                 | Bloodstream infection            |                                                                                                                                                                                                   |
| GCA_001853405.1 | <i>meningoseptica</i> | EM2             | 2016 | USA: Michigan       | <i>H. sapiens</i> (tracheal)              | Infection                        |                                                                                                                                                                                                   |
| GCA_001853425.1 | <i>meningoseptica</i> | EM3             | 2016 |                     | <i>H. sapiens</i> (tracheal)              | Infection                        |                                                                                                                                                                                                   |
| GCA_002023055.1 | <i>meningoseptica</i> | G4076           |      | England             | <i>H. sapiens</i>                         |                                  | Nicholson AC et al., "Draft Genome Sequences of Strains Representing Each of the Elizabethkingia Genomospecies Previously Determined by DNA-DNA Hybridization.", Genome Announc, 2016 Mar 10;4(2) |
| GCA_002022145.1 | <i>meningoseptica</i> | G4120           | 1983 | France              | <i>H. sapiens</i> (urine)                 |                                  | Nicholson AC et al., "Draft Genome Sequences of Strains Representing Each of the Elizabethkingia Genomospecies Previously Determined by DNA-DNA Hybridization.", Genome Announc, 2016 Mar 10;4(2) |
| GCA_001521755.1 | <i>meningoseptica</i> | KC1913          | 1949 | USA: Massachusetts  | <i>H. sapiens</i> (CSF)                   |                                  | Nicholson AC et al., "Draft Genome Sequences of Strains Representing Each of the Elizabethkingia Genomospecies Previously Determined by DNA-DNA Hybridization.", Genome Announc, 2016 Mar 10;4(2) |
| GCA_000367325.1 | <i>meningoseptica</i> | NBRC 12535      |      |                     |                                           |                                  | Matyi SA et al., "Draft Genome Sequences of Elizabethkingia meningoseptica.", Genome Announc, 2013 Jul 11;1(4)                                                                                    |
| GCA_900475375.1 | <i>meningoseptica</i> | NCTC10016       | 1958 |                     | <i>H. sapiens</i> (infant CSF)            |                                  |                                                                                                                                                                                                   |
| GCA_900447345.1 | <i>meningoseptica</i> | NCTC10586       | 1956 | USA: South Carolina | <i>H. sapiens</i> (newborn, spinal fluid) |                                  |                                                                                                                                                                                                   |
| GCA_900447425.1 | <i>meningoseptica</i> | NCTC10588       | 2017 |                     |                                           |                                  |                                                                                                                                                                                                   |
| GCA_900447195.1 | <i>meningoseptica</i> | NCTC11305       | 1978 |                     | <i>H. sapiens</i> (tracheal exudate)      |                                  |                                                                                                                                                                                                   |
| GCA_900143665.1 | <i>meningoseptica</i> | NV2016          |      |                     | <i>H. sapiens</i> (rectal swab)           | Aortic valve replacement surgery |                                                                                                                                                                                                   |
| GCA_002294465.1 | <i>meningoseptica</i> | UBA907          |      | USA: New York       | Wood                                      |                                  | Parks DH et al., "Recovery of nearly 8,000 metagenome-assembled genomes substantially expands the tree of life.", Nat Microbiol, 2017 Sep 11;2(11):1533-1542                                      |
| GCA_000955665.1 | <i>miricola</i>       | BM10            | 2009 | South Korea: Seoul  | Reticulitermes (hindgut)                  | speratus nil                     | Lee D et al., "Complete Genome Sequence of Elizabethkingia sp. BM10, a Symbiotic Bacterium of the Wood-Feeding Termite Reticulitermes speratus KMT1.", Genome Announc, 2015 Oct 8;3(5)            |

|                 |                  |                 |      |                           |                                                                 |                       |                                                                                                                                                                                                   |
|-----------------|------------------|-----------------|------|---------------------------|-----------------------------------------------------------------|-----------------------|---------------------------------------------------------------------------------------------------------------------------------------------------------------------------------------------------|
| GCA_002557775.1 | <i>miricola</i>  | EM798-26        | 2015 | Taiwan:<br>Kaohsiung      | <i>H. sapiens</i> (blood)                                       | Lymphoma (81<br>yo M) |                                                                                                                                                                                                   |
| GCA_000769445.1 | <i>miricola</i>  | ATCC 33958      | 1982 | USA                       | contaminated commercial<br>preparation of<br>carboxipeptidase A |                       | Matyi SA et al., "Draft Genome Sequence of Strain ATCC 33958, Reported To Be Elizabethkingia miricola.", Genome Announc, 2015 Jul 23;3(4)                                                         |
| GCA_001483145.1 | <i>miricola</i>  | EM_CHUV         | 2014 | Switzerland               | <i>H. sapiens</i> (endotracheal<br>sections)                    | Pneumonia             |                                                                                                                                                                                                   |
| GCA_001675285.1 | <i>miricola</i>  | GTC_862         |      |                           |                                                                 |                       | Nicholson AC et al., "Draft Genome Sequences of Strains Representing Each of the Elizabethkingia Genomespecies Previously Determined by DNA-DNA Hybridization.", Genome Announc, 2016 Mar 10;4(2) |
| GCA_002023335.1 | <i>miricola</i>  | CSID_3000517120 | 2016 | USA: Michigan             | <i>H. sapiens</i>                                               |                       | Nicholson AC et al., "Draft Genome Sequences of Strains Representing Each of the Elizabethkingia Genomespecies Previously Determined by DNA-DNA Hybridization.", Genome Announc, 2016 Mar 10;4(2) |
| GCA_002023475.1 | <i>miricola</i>  | G4121           | 1982 | Sweden                    | <i>H. sapiens</i>                                               |                       | Nicholson AC et al., "Draft Genome Sequences of Strains Representing Each of the Elizabethkingia Genomespecies Previously Determined by DNA-DNA Hybridization.", Genome Announc, 2016 Mar 10;4(2) |
| NZ_MCJF00000000 | <i>miricola</i>  | HvH-WGS333      | 2015 | Denmark:<br>Frederiksberg |                                                                 |                       | Eriksen, Helle Brander et al. "Determination of Elizabethkingia Diversity by MALDI-TOF Mass Spectrometry and Whole-Genome Sequencing." Emerging infectious diseases vol. 23,2 (2017): 320-323.    |
| GCA_002023515.1 | <i>miricola</i>  | CSID_3000516464 | 2016 | USA: Michigan             | <i>H. sapiens</i>                                               |                       | Nicholson AC et al., "Draft Genome Sequences of Strains Representing Each of the Elizabethkingia Genomespecies Previously Determined by DNA-DNA Hybridization.", Genome Announc, 2016 Mar 10;4(2) |
| GCA_002023575.1 | <i>miricola</i>  | CSID_3000516998 | 2016 | USA: South<br>Carolina    | <i>H. sapiens</i>                                               |                       | Nicholson AC et al., "Draft Genome Sequences of Strains Representing Each of the Elizabethkingia Genomespecies Previously Determined by DNA-DNA Hybridization.", Genome Announc, 2016 Mar 10;4(2) |
| GCA_002023685.1 | <i>miricola</i>  | G4074           |      | England                   | <i>H. sapiens</i>                                               |                       | Nicholson AC et al., "Draft Genome Sequences of Strains Representing Each of the Elizabethkingia Genomespecies Previously Determined by DNA-DNA Hybridization.", Genome Announc, 2016 Mar 10;4(2) |
| GCA_002738605.1 | <i>miricola</i>  | FL160902        | 2016 | China: Hunan              | Frog from farming pond                                          | Meningitis            |                                                                                                                                                                                                   |
| GCA_003014895.1 | <i>miricola</i>  | QZY.EM          | 2016 | China: Sichuan            | Pelophylax nigromaculatus<br>(brain)                            |                       |                                                                                                                                                                                                   |
| GCA_003298875.1 | <i>miricola</i>  | 6012926         | 2015 | USA                       | <i>H. sapiens</i> (blood)                                       |                       |                                                                                                                                                                                                   |
| GCA_900092045.1 | <i>miricola</i>  | KCTC 12492      |      |                           |                                                                 |                       |                                                                                                                                                                                                   |
| GCA_900157035.1 | <i>miricola</i>  | LDVH-337.01     | 2002 | France                    | <i>Xenopus laevi</i> (spleen)                                   |                       |                                                                                                                                                                                                   |
| GCA_001521745.1 | <i>miricola</i>  | G4071           | 1978 | France:<br>Strasbourg     | <i>H. sapiens</i> (tracheal exudate)                            |                       | Nicholson AC et al., "Draft Genome Sequences of Strains Representing Each of the Elizabethkingia Genomespecies Previously Determined by DNA-DNA Hybridization.", Genome Announc, 2016 Mar 10;4(2) |
| GCA_900157015.1 | <i>miricola</i>  | CIP111047       |      |                           |                                                                 |                       | INSTITUT PASTEUR                                                                                                                                                                                  |
| SAMEA50780668   | <i>miricola</i>  | ERS1505822      |      |                           |                                                                 |                       | INSTITUT PASTEUR                                                                                                                                                                                  |
| GCA_002023775.1 | <i>bruuniana</i> | G0146           |      | England                   | <i>H. sapiens</i>                                               |                       | Nicholson AC et al., "Draft Genome Sequences of Strains Representing Each of the Elizabethkingia Genomespecies                                                                                    |

|                 |                  |                 |      |                      |                          |                                                                                                                                                                                                   |
|-----------------|------------------|-----------------|------|----------------------|--------------------------|---------------------------------------------------------------------------------------------------------------------------------------------------------------------------------------------------|
| GCA_002023765.1 | <i>bruuniana</i> | CSID_3000516589 | 2016 | USA: Michigan        | <i>H. sapiens</i>        | Previously Determined by DNA-DNA Hybridization.", Genome Announc, 2016 Mar 10;4(2)                                                                                                                |
| GCA_002023545.1 | <i>bruuniana</i> | CSID_3015183685 | 2016 | USA: Wisconsin       | <i>H. sapiens</i>        | Nicholson AC et al., "Draft Genome Sequences of Strains Representing Each of the Elizabethkingia Genomospecies Previously Determined by DNA-DNA Hybridization.", Genome Announc, 2016 Mar 10;4(2) |
| GCA_002023205.1 | <i>bruuniana</i> | G0153           |      | Ireland              | <i>H. sapiens</i> blood  | Nicholson AC et al., "Draft Genome Sequences of Strains Representing Each of the Elizabethkingia Genomospecies Previously Determined by DNA-DNA Hybridization.", Genome Announc, 2016 Mar 10;4(2) |
| GCA_002023385.1 | <i>occulta</i>   | F8124           |      |                      | <i>H. sapiens</i>        | Nicholson AC et al., "Draft Genome Sequences of Strains Representing Each of the Elizabethkingia Genomospecies Previously Determined by DNA-DNA Hybridization.", Genome Announc, 2016 Mar 10;4(2) |
| GCA_002023715.1 | <i>occulta</i>   | G4070           | 1977 | Australia: Melbourne | <i>H. sapiens</i> sputum | Nicholson AC et al., "Draft Genome Sequences of Strains Representing Each of the Elizabethkingia Genomospecies Previously Determined by DNA-DNA Hybridization.", Genome Announc, 2016 Mar 10;4(2) |
| GCA_002023365.1 | <i>ursingii</i>  | C1558           |      |                      | <i>H. sapiens</i>        | Nicholson AC et al., "Draft Genome Sequences of Strains Representing Each of the Elizabethkingia Genomospecies Previously Determined by DNA-DNA Hybridization.", Genome Announc, 2016 Mar 10;4(2) |
| GCA_002023405.1 | <i>ursingii</i>  | CSID_3000516135 | 2016 | USA: Wisconsin       | <i>H. sapiens</i>        | Nicholson AC et al., "Draft Genome Sequences of Strains Representing Each of the Elizabethkingia Genomospecies Previously Determined by DNA-DNA Hybridization.", Genome Announc, 2016 Mar 10;4(2) |
| GCA_002022125.1 | <i>ursingii</i>  | G4123           | 1982 | Denmark              | <i>H. sapiens</i>        | Nicholson AC et al., "Draft Genome Sequences of Strains Representing Each of the Elizabethkingia Genomospecies Previously Determined by DNA-DNA Hybridization.", Genome Announc, 2016 Mar 10;4(2) |
| GCA_003053575.1 | Species          | YR191           | 2017 |                      |                          | DOE Joint Genome Institute                                                                                                                                                                        |
| GCA_003058195.1 | Species          | YR214           |      |                      |                          | DOE Joint Genome Institute                                                                                                                                                                        |

Table S2: SPAdes and prokka genome assembly and annotation statistics of Australian clinical isolates analysed in this study.

| <b>Isolate ID</b> | <b><i>Elizabethkingia</i><br/>Species</b> | <b>Genome Size<br/>(Mbp)</b> | <b>No. of<br/>Contigs</b> | <b>No. of<br/>CDs</b> | <b>Sample<br/>accession<br/>number</b> |
|-------------------|-------------------------------------------|------------------------------|---------------------------|-----------------------|----------------------------------------|
| <b>EkQ1</b>       | <i>miricola</i>                           | 4.08                         | 72                        | 3738                  | SRS5502595                             |
| <b>EkQ3</b>       | <i>anophelis</i>                          | 4.12                         | 47                        | 3789                  | SRS5502596                             |
| <b>EkQ4</b>       | <i>meningoseptica</i>                     | 3.97                         | 97                        | 3573                  | SRS5502607                             |
| <b>EkQ5</b>       | <i>anophelis</i>                          | 3.86                         | 86                        | 3553                  | SRS5502610                             |
| <b>EkQ6</b>       | <i>anophelis</i>                          | 4.27                         | 158                       | 3893                  | SRS5502611                             |
| <b>EkQ7</b>       | <i>anophelis</i>                          | 4.05                         | 94                        | 3742                  | SRS5502612                             |
| <b>EkQ8</b>       | <i>anophelis</i>                          | 3.96                         | 68                        | 3612                  | SRS5502613                             |
| <b>EkQ10</b>      | <i>miricola</i>                           | 4.20                         | 106                       | 3868                  | SRS5502614                             |
| <b>EkQ11</b>      | <i>bruuniana</i>                          | 4.39                         | 83                        | 4118                  | SRS5502615                             |
| <b>EkQ12</b>      | <i>meningoseptica</i>                     | 3.97                         | 97                        | 3571                  | SRS5502616                             |
| <b>EkQ13</b>      | <i>miricola</i>                           | 4.18                         | 124                       | 3883                  | SRS5502597                             |
| <b>EkQ15</b>      | <i>anophelis</i>                          | 4.18                         | 144                       | 3808                  | SRS5502598                             |
| <b>EkQ16</b>      | <i>anophelis</i>                          | 3.95                         | 50                        | 3645                  | SRS5502599                             |
| <b>EkQ17</b>      | <i>anophelis</i>                          | 3.88                         | 85                        | 3556                  | SRS5502600                             |
| <b>EkM1</b>       | <i>anophelis</i>                          | 3.92                         | 99                        | 3577                  | SRS5502601                             |
| <b>EkM2</b>       | <i>anophelis</i>                          | 3.92                         | 86                        | 3577                  | SRS5502602                             |
| <b>EkM3</b>       | <i>anophelis</i>                          | 4.01                         | 91                        | 3681                  | SRS5502603                             |
| <b>EkS1</b>       | <i>anophelis</i>                          | 4.04                         | 103                       | 3690                  | SRS5502604                             |
| <b>EkS2</b>       | <i>anophelis</i>                          | 3.36                         | 101                       | 3660                  | SRS5502605                             |
| <b>EkS3</b>       | <i>anophelis</i>                          | 3.97                         | 101                       | 3667                  | SRS5502606                             |
| <b>EkS4</b>       | <i>anophelis</i>                          | 3.94                         | 79                        | 3675                  | SRS5502608                             |
| <b>EkS5</b>       | <i>anophelis</i>                          | 4.28                         | 87                        | 3981                  | SRS5502609                             |

Table S3. dN/dS ratios of clonal *Elizabethkingia anophelis* identified from Australian clinical and environmental isolates

| Positive selection  |       |       |       |       |
|---------------------|-------|-------|-------|-------|
|                     | EkQ5  | EK2   | EK6   | EkQ17 |
| EkQ5                |       |       |       |       |
| EK2                 | n/c   |       |       |       |
| EK6                 | 1.000 | n/c   |       |       |
| EkQ17               | 1.000 | 1.000 | 0.154 |       |
|                     |       |       |       |       |
| Purifying selection |       |       |       |       |
|                     | EkQ5  | EK2   | EK6   | EkQ17 |
| EkQ5                |       |       |       |       |
| EK2                 | n/c   |       |       |       |
| EK6                 | 0.121 | n/c   |       |       |
| EkQ17               | 0.198 | 0.07  | 1     |       |
|                     |       |       |       |       |
| Neutral selection   |       |       |       |       |
|                     | EkQ5  | EK2   | EK6   | EkQ17 |
| EkQ5                |       |       |       |       |
| EK2                 | n/c   |       |       |       |
| EK6                 | 0.243 | n/c   |       |       |
| EkQ17               | 0.396 | 0.137 | 0.307 |       |

The probability of rejecting the null hypothesis of strict-neutrality ( $dN = dS$ ) in favor of the alternative hypothesis ( $dN > dS$ ) (below diagonal) is shown. Values of P less than 0.05 are considered significant at the 5% level and are highlighted. dS and dN are the numbers of synonymous and nonsynonymous substitutions per site, respectively. The variance of the difference was computed using the analytical method. Analyses were conducted using the Nei-Gojobori method [1]. Evolutionary analyses were conducted in MEGA X [2]. The presence of n/c in the results denotes cases in which it was not possible to estimate evolutionary distances.

1. Nei M. and Gojobori T. (1986). Simple methods for estimating the numbers of synonymous and nonsynonymous nucleotide substitutions. *Molecular Biology and Evolution* 3:418-426.
2. Kumar S., Stecher G., Li M., Knyaz C., and Tamura K. (2018). MEGA X: Molecular Evolutionary Genetics Analysis across computing platforms. *Molecular Biology and Evolution* 35:1547-1549.

Table S4. Minimum inhibitory concentration data derived from broth microdilution testing of the 16 Australian *Elizabethkingia anophelis* clinical isolates against 39 clinically relevant antimicrobials. White cells represent the range of concentration tested for each antimicrobial. EUCAST and CLSI breakpoints are shown on the right where available. Blue and yellow cells indicate no breakpoint is currently available for this antimicrobial.





Table S5. Minimum inhibitory concentration data derived from broth microdilution testing of the 2 *Elizabethkingia meningoseptica* (blue) and 3 *Elizabethkingia miricola* (orange) Australian clinical isolates against 39 clinically relevant antimicrobials. White cells represent the range of concentration tested for each antimicrobial. EUCAST and CLSI breakpoints are shown on the right where available. Blue and yellow cells indicate no breakpoint is currently available for this antimicrobial.
